# Supplementary material for: Using Fomitopsis pinicola for bioinspired synthesis of titanium dioxide and silver nanoparticles, targeting biomedical applications
Source: PubMed Central journal article supplement (PMC9056542; doi:10.1039/d0ra02637a), 2020-08-28
Supplement: RA-010-D0RA02637A-s001.pdf [file RA-010-D0RA02637A-s001.pdf]

## Operating *Fomitopsis pinicola* for Bioinspired Synthesis of Titanium Dioxide and Silver Nanoparticles, Targeting Biomedical applications

Dr. Suriya Rehman<sup>1\*</sup>, Dr. Rabindran Jermy<sup>2\*</sup>, Ms. Sarah Mousa Asiri<sup>4</sup>, Dr. Manzoor A. Shah<sup>3</sup>, Ms. Romana Farooq<sup>2</sup>, Dr. Vijaya Ravinayagam<sup>5</sup>, Dr. Mohammad Azam Ansari<sup>1</sup>, Ms. Zainab Alsalem<sup>1</sup>, Reem Al Jindan<sup>6</sup>, Prof. Firdos Alam Khan<sup>7</sup>

### SAMPLING:

Extensive field surveys were conducted in the coniferous forests of Budgam, Ganderbal, Anantnag, Baramullah and Pulwama district of Kashmir valley during 2016-2018 growing seasons of mushrooms.

| SITE NAME | ALTITUDE MASL | LATITUDE | LONGITUDE | SITE CHARACTERISTICS                    | DISTRICT  |
|-----------|---------------|----------|-----------|-----------------------------------------|-----------|
| Mammer    | 2400 m        | 34°14' N | 75°01' E  | Open forest areas with coniferous trees | Ganderbal |
| Kellar    | 1630 m        | 33°46' N | 74°46' E  | Open coniferous forests                 | Pulwama   |
| Gulmarg   | 2703m         | 34°03' N | 74°23' E  | Dense forest area with mixed plantation | Baramulla |
| Yusmarg   | 2400m         | 33°50' N | 74°38' E  | Open forests some grassy fields         | Budgam    |
| Pahalgam  | 2740 m        | 34°01' N | 74°31' E  | Dense Coniferous forests                | Anantnag  |
